# Supplementary material
Source: PubMed Central journal article supplement (PMC3188810)
Supplement: supp_138.7.1329_DEV058677TableS1.pdf [file supp_138.7.1329_DEV058677TableS1.pdf]

**Table S1. Morphometric analyses of Schwann cells and axons in electron microscopy images from *N-WASP*<sup>-/-</sup> and control sciatic nerves**

| Measures                                      | Control    |              | <i>N-WASP</i> <sup>-/-</sup> |              | P-value |
|-----------------------------------------------|------------|--------------|------------------------------|--------------|---------|
| <b>Large caliber axons</b>                    |            |              |                              |              |         |
| Axon diameter (μm)                            | 5.49±1.16  | (n=55)       | 3.65±0.71                    | (n=55)       | <0.001  |
| Axon density (1000/mm <sup>2</sup> )          | 23.30±0.50 | (n=530)      | 18.20±0.49                   | (n=526)      | 0.09    |
| Axons/Schwann cell                            | 1±0        | (n=1250)     | 1±0                          | (n=1250)     | –       |
| Myelinated axons (%)                          | 100        | (n=850)      | 0.67±0.29                    | (n=850)      | –       |
| G-ratio                                       | 0.67±0.06  | (n=30)       | 0.89±0.04                    | (n=30)       | <0.001  |
| Axons with escaped Schwann cell processes (%) | 0          | (n=150)      | 28.68±7.02                   | (n=150)      | –       |
| Unsorted bundles/1000 μm <sup>2</sup> *       | 0          | (n=8 fields) | 1.19±0.22                    | (n=8 fields) | –       |
| <b>Axons in Remak bundles</b>                 |            |              |                              |              |         |
| Axon diameter (μm)                            | 0.73±0.15  | (n=67)       | 0.79±0.19                    | (n=58)       | 0.03    |
| Axon density (1000/mm <sup>2</sup> )          | 71.60±5.21 | (n=600)      | 87.30±4.68                   | (n=600)      | 0.64    |
| Axons/Schwann cell                            | 10.03±2.81 | (n=36)       | 9.13±3.53                    | (n=45)       | 0.34    |

Measurements for large caliber (>2 μm) axons and small diameter Remak bundle axons were derived from sciatic nerve cross-sections obtained at P28-P34, with the exception of the quantification of unsorted bundles (\*) which was performed on P5 samples. Values shown represent the mean ± s.e.m. with P-values determined where appropriate by Student's *t*-test.
