# Supplementary material
Source: PubMed Central journal article supplement (PMC3188810)

DAPI

N-WASp

MBP

Merge

P1

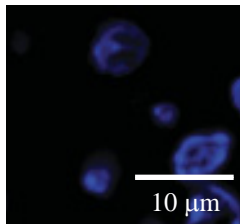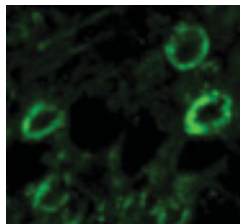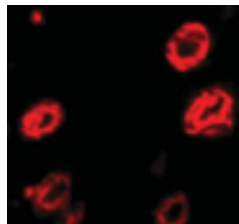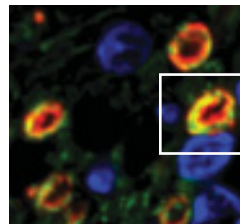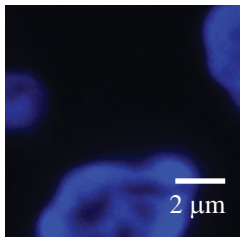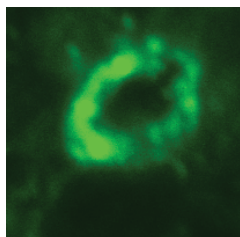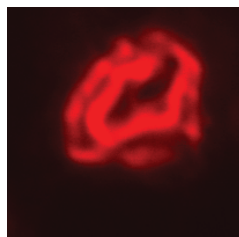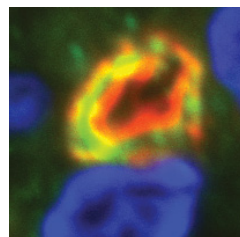

Supplement: supp_138.7.1329_DEV058677FigS1.pdf [file supp_138.7.1329_DEV058677FigS1.pdf]

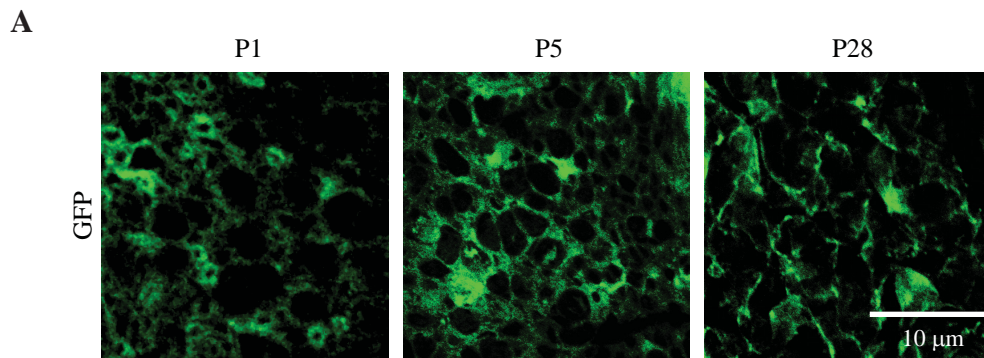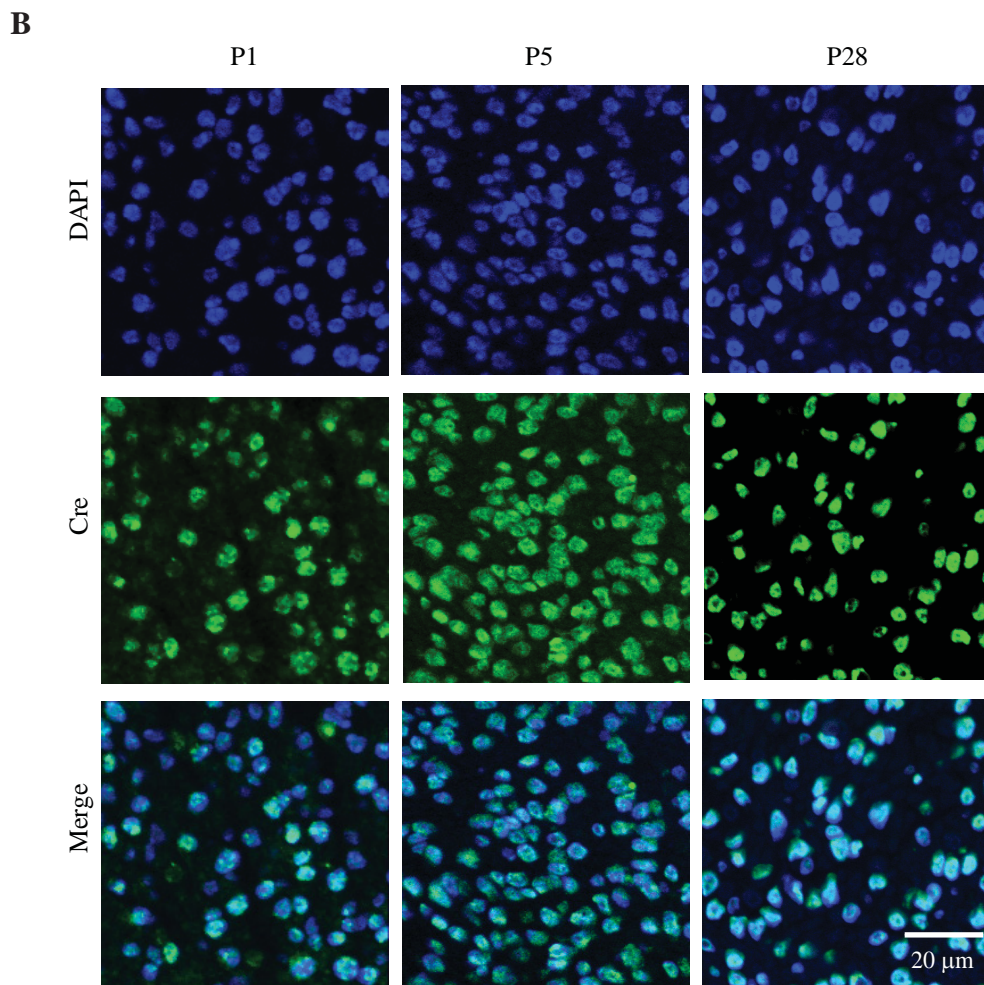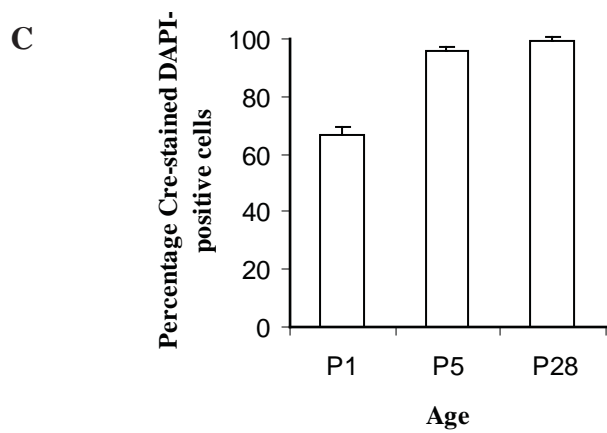

Supplement: supp_138.7.1329_DEV058677FigS2.pdf [file supp_138.7.1329_DEV058677FigS2.pdf]

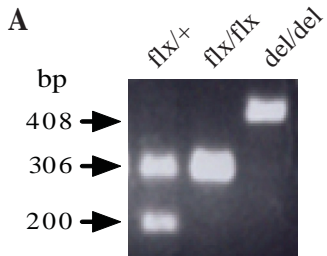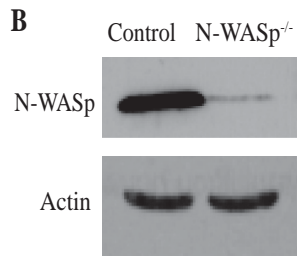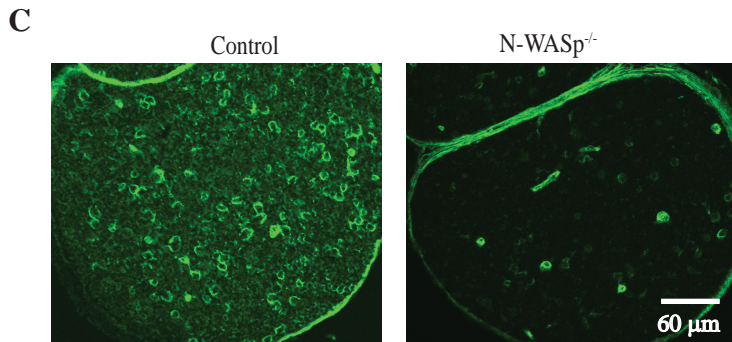

Supplement: supp_138.7.1329_DEV058677FigS3.pdf [file supp_138.7.1329_DEV058677FigS3.pdf]

A

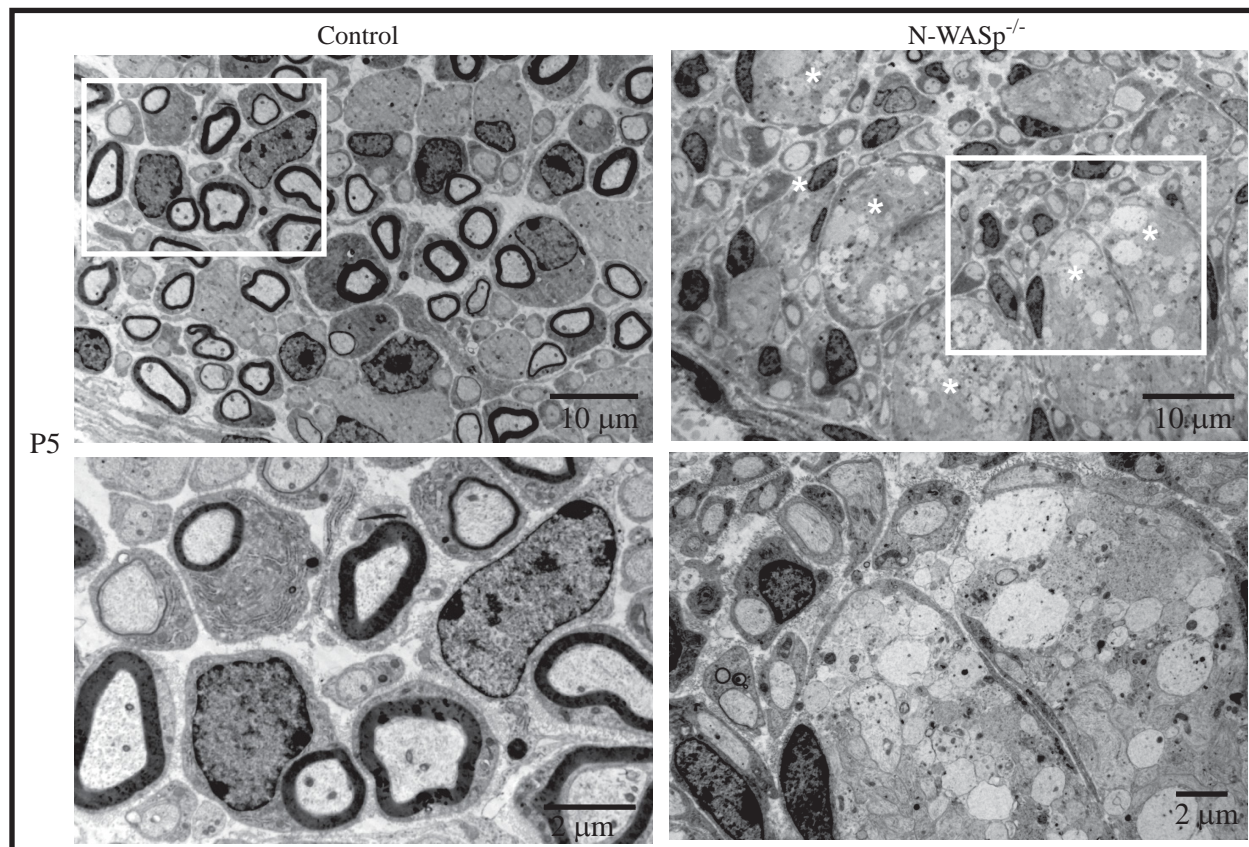

B

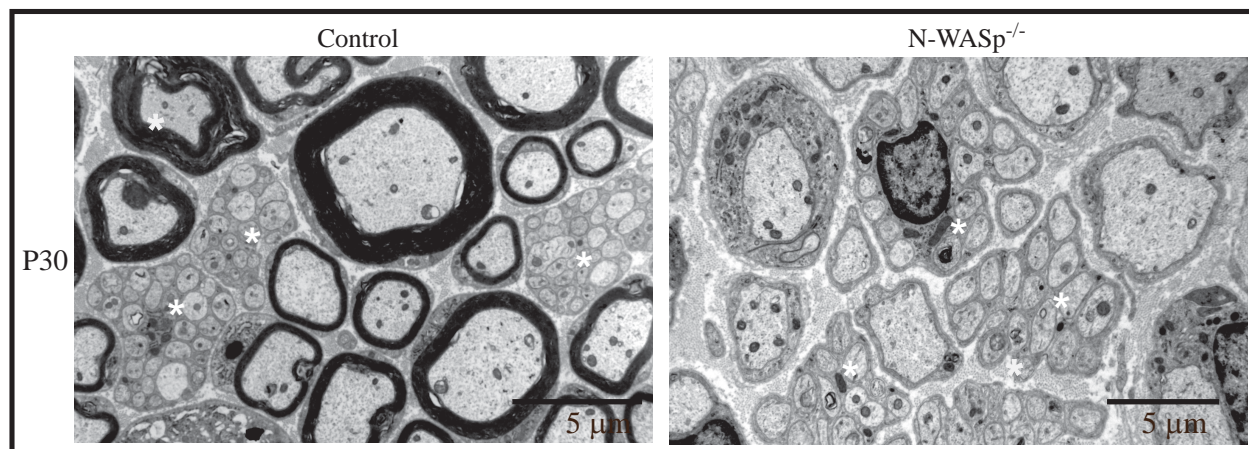

Supplement: supp_138.7.1329_DEV058677FigS4.pdf [file supp_138.7.1329_DEV058677FigS4.pdf]
